# Supplementary material
Source: PubMed Central journal article supplement (PMC9691567)

**Supplementary Tables:**

Supplementary Table 1. Comparison of clinical characteristics of interval and screen detected CRCs

Supplementary Table 2. CRC-specific and overall mortality of interval CRCs according to cancer stage in PLCO and NHS/HPFS

Supplementary Table 3. Characteristics of CRC patients with WES data in PLCO and NHS/HPFS

Supplementary Table 4: Comparison of mutational characteristics of interval and screen detected CRCs

Supplementary Table 5: Comparison of mutational characteristics of interval and screen detected CRC according to stage of cancer

**Supplementary Table 1. Comparison of clinical characteristics of interval and screen detected CRCs**

| Characteristics                                        | Screen detected | PLCO                    | NHS/HPFS                |
|--------------------------------------------------------|-----------------|-------------------------|-------------------------|
|                                                        |                 | OR (95% CI)<br>Interval | OR (95% CI)<br>Interval |
| <b>Age at diagnosis</b>                                |                 |                         |                         |
| 10-year increase                                       | ref             | 4.15 (3.00, 5.74)       | 1.38 (1.20, 1.58)       |
| <b>Year of diagnosis</b>                               |                 |                         |                         |
| 5-year increase                                        | ref             | 7.12 (7.11, 7.13)       | 1.31 (1.20, 1.43)       |
| <b>Sex</b>                                             |                 |                         |                         |
| Female vs. male                                        | ref             | 1.88 (1.26, 2.79)       | 0.94 (0.73, 1.20)       |
| <b>Family history of CRC</b>                           |                 |                         |                         |
| Yes vs. no                                             | ref             | 1.03 (0.59, 1.79)       | 0.83 (0.63, 1.11)       |
| <b>Tumor location</b>                                  |                 |                         |                         |
| Distal vs. proximal                                    | ref             | 1.82 (1.01, 3.29)       | 1.11 (0.85, 1.43)       |
| <b>Stage</b>                                           |                 |                         |                         |
| Stage II/III vs I                                      | ref             | 3.80 (2.45, 5.92)       | 1.51 (1.11, 2.04)       |
| Stage IV vs I                                          | ref             | 10.12 (4.36, 23.52)     | 2.42 (1.45, 4.05)       |
| <b>Tumor differentiation</b>                           |                 |                         |                         |
| Poor/undifferentiated vs. well/moderate differentiated | ref             | 2.14 (1.21, 3.79)       | 1.40 (0.72, 2.72)       |

Notes: Univariate OR (95% CI) was computed for the comparison between interval and screen detected cancers. Abbreviations: CI, confidence interval; OR, odds ratio; CRC, colorectal cancer; PLCO, Prostate, Lung, Colorectal and Ovarian cancer screening trial; NHS, Nurses' Health Study; HPFS, Health Professionals Follow-up Study.

**Supplementary Table 2. CRC-specific and overall mortality of interval CRCs according to cancer stage in PLCO and NHS/HPFS**

|                     | CRC-specific mortality |               |                   |                                    | Overall mortality |                   |                                    |
|---------------------|------------------------|---------------|-------------------|------------------------------------|-------------------|-------------------|------------------------------------|
|                     | No. of cases           | No. of events | Crude HR (95% CI) | Multivariable adjusted HR (95% CI) | No. of events     | Crude HR (95% CI) | Multivariable adjusted HR (95% CI) |
| <b>All</b>          |                        |               |                   |                                    |                   |                   |                                    |
| Screen detected     | 740                    | 195           | reference         | reference                          | 378               | reference         | reference                          |
| Interval            | 696                    | 249           | 1.66 (1.33, 2.07) | 1.47 (1.21, 1.78)                  | 367               | 1.48 (1.16, 1.89) | 1.27 (1.09, 1.47)                  |
| Others              | 3400                   | 1808          | 2.47 (2.13, 2.86) | 2.00 (1.71, 2.33)                  | 2278              | 1.92 (1.64, 2.25) | 1.65 (1.46, 1.86)                  |
| <b>Stage I</b>      |                        |               |                   |                                    |                   |                   |                                    |
| Screen detected     | 305                    | 44            | reference         | reference                          | 136               | reference         | reference                          |
| Interval            | 167                    | 30            | 1.10 (0.36, 3.32) | 0.87 (0.30, 2.50)                  | 61                | 1.13 (0.83, 1.54) | 0.89 (0.64, 1.22)                  |
| Others              | 642                    | 169           | 1.57 (1.11, 2.22) | 1.23 (0.80, 1.89)                  | 288               | 1.32 (0.76, 2.30) | 1.02 (0.80, 1.31)                  |
| <b>Stage II/III</b> |                        |               |                   |                                    |                   |                   |                                    |
| Screen detected     | 282                    | 98            | reference         | reference                          | 152               | reference         | reference                          |
| Interval            | 327                    | 102           | 1.13 (0.85, 1.49) | 1.09 (0.82, 1.44)                  | 156               | 1.20 (0.96, 1.50) | 1.05 (0.83, 1.32)                  |
| Others              | 1570                   | 721           | 1.54 (1.25, 1.90) | 1.68 (1.35, 2.09)                  | 936               | 1.42 (1.19, 1.69) | 1.48 (1.23, 1.78)                  |
| <b>Stage IV</b>     |                        |               |                   |                                    |                   |                   |                                    |
| Screen detected     | 37                     | 31            | reference         | reference                          | 32                | reference         | reference                          |
| Interval            | 80                     | 72            | 2.01 (1.32, 3.08) | 2.06 (1.33, 3.18)                  | 76                | 2.07 (1.36, 3.14) | 2.08 (1.36, 3.19)                  |
| Others              | 627                    | 585           | 1.98 (1.38, 2.85) | 2.06 (1.41, 3.02)                  | 597               | 1.98 (1.39, 2.83) | 2.03 (1.40, 2.95)                  |

Notes: Multivariable-adjusted HRs (95% CIs) were adjusted for age at diagnosis, year of diagnosis, sex, family history of CRC, tumor location, grade, and stage. Results of NHS/HPFS and PLCO were pooled using random-effects meta-analysis ( $P$  for heterogeneity > .05).

Supplementary Table 3. Characteristics of CRC patients with WES data in PLCO and NHS/HPFS

| Characteristics                           | PLCO                      |                    |                  | NHS/HPFS                   |                    |                   |
|-------------------------------------------|---------------------------|--------------------|------------------|----------------------------|--------------------|-------------------|
|                                           | Screen detected<br>(n=54) | Interval<br>(n=20) | Others<br>(n=73) | Screen detected<br>(n=129) | Interval<br>(n=97) | Others<br>(n=570) |
| <b>Age at diagnosis</b>                   | 64.8 ± 6.1                | 69.2 ± 6.8         | 72.6 ± 6.7       | 71.4 ± 7.7                 | 73.0 ± 8.1         | 69.9 ± 8.8        |
| <b>Female</b>                             | 22 (40.7)                 | 11 (55.0)          | 33 (45.2)        | 69 (53.5)                  | 53 (54.6)          | 365 (64.0)        |
| <b>Family history of CRC</b>              | 9 (16.7)                  | 4 (20.0)           | 12 (16.4)        | 28 (21.7)                  | 24 (24.7)          | 106 (18.6)        |
| <b>Tumor location</b>                     |                           |                    |                  |                            |                    |                   |
| Cecum                                     | 4 (7.4)                   | 0 (0.0)            | 23 (31.5)        | 22 (17.1)                  | 16 (16.5)          | 107 (18.8)        |
| Ascending to transverse colon             | 5 (9.3)                   | 4 (20.0)           | 39 (53.4)        | 45 (34.9)                  | 34 (35.1)          | 177 (31.1)        |
| Splenic flexure to sigmoid                | 28 (51.9)                 | 12 (60.0)          | 6 (8.2)          | 37 (28.7)                  | 27 (27.8)          | 162 (28.4)        |
| Rectosigmoid and rectum                   | 17 (31.5)                 | 4 (20.0)           | 5 (6.8)          | 25 (19.4)                  | 20 (20.6)          | 123 (21.6)        |
| <b>Stage</b>                              |                           |                    |                  |                            |                    |                   |
| Stage I                                   | 29 (53.7)                 | 5 (25.0)           | 20 (27.4)        | 41 (31.8)                  | 24 (26.4)          | 126 (24.0)        |
| Stage II                                  | 13 (24.1)                 | 8 (40.0)           | 21 (28.8)        | 39 (30.2)                  | 30 (33.0)          | 170 (32.3)        |
| Stage III                                 | 10 (18.5)                 | 5 (25.0)           | 19 (26.0)        | 32 (24.8)                  | 31 (32.0)          | 156 (29.7)        |
| Stage IV                                  | 2 (3.7)                   | 2 (10.0)           | 13 (17.8)        | 8 (6.2)                    | 6 (6.6)            | 74 (14.0)         |
| <b>Tumor differentiation</b>              |                           |                    |                  |                            |                    |                   |
| Well or moderately differentiated         | 49 (90.7)                 | 15 (75.0)          | 50 (68.5)        | 114 (91.2)                 | 81 (86.2)          | 507 (92.2)        |
| Poorly differentiated or undifferentiated | 4 (7.4)                   | 5 (25.0)           | 23 (31.5)        | 11 (8.8)                   | 13 (13.8)          | 43 (7.8)          |
| <b>Year of diagnosis</b>                  |                           |                    |                  |                            |                    |                   |
| ≤ 2000                                    | 40 (74.1)                 | 6 (30.0)           | 9 (12.3)         | 58 (45.0)                  | 31 (32.0)          | 315 (55.3)        |
| > 2000                                    | 14 (25.9)                 | 14 (70.0)          | 64 (87.7)        | 71 (55.0)                  | 66 (68.0)          | 255 (44.7)        |

Notes: Abbreviation: CRC, colorectal cancer; PLCO, Prostate, Lung, Colorectal and Ovarian cancer screening trial; NHS, Nurses' Health Study; HPFS, Health Professionals Follow-up Study. Continuous variables were presented as mean (standard deviation) and categorical variables were presented as number (percentage). Percentages were calculated among non-missing data.

**Supplementary Table 4: Comparison of mutational characteristics of interval and screen detected CRCs**

| <b>Gene name*</b> | <b>Interval (n=117)</b> | <b>Screen detected (n=183)</b> | <b>OR (95% CI)</b> | <b>False Discovery Rate adjusted <i>P</i> values</b> |
|-------------------|-------------------------|--------------------------------|--------------------|------------------------------------------------------|
| BRAF              | 31                      | 25                             | 2.26 (1.20, 4.27)  | .23                                                  |
| APC               | 59                      | 115                            | 0.59 (0.36, 0.98)  | .26                                                  |
| ACVR2A            | 25                      | 20                             | 2.20 (1.10, 4.42)  | .26                                                  |
| TP53              | 55                      | 101                            | 0.71 (0.43, 1.16)  | .49                                                  |
| KRAS              | 24                      | 59                             | 0.54 (0.30, 0.96)  | .26                                                  |
| SYNE1             | 33                      | 26                             | 2.35 (1.27, 4.39)  | .18                                                  |
| TTN               | 41                      | 72                             | 0.82 (0.49, 1.37)  | .78                                                  |
| MUC16             | 22                      | 37                             | 0.91 (0.48, 1.69)  | .92                                                  |
| PIK3CA            | 22                      | 31                             | 1.13 (0.58, 2.15)  | .92                                                  |
| OBSCN             | 21                      | 28                             | 1.20 (0.48, 1.69)  | .86                                                  |

Note: \*ORs (95% CIs) were calculated for ten most frequently mutated genes (i.e., genes listed in Figure S1B) in PLCO and NHS/HPFS.

**Supplementary Table 5: Comparison of mutational characteristics of interval and screen detected CRC according to stage of cancer**

|               | <b>Top differentially mutated gene</b> | <b>Interval cancer [mutation/total case]</b> | <b>Screen detected cancer [mutation/total case]</b> | <b>False Discovery Rate adjusted <i>P</i> values</b> |
|---------------|----------------------------------------|----------------------------------------------|-----------------------------------------------------|------------------------------------------------------|
| Stage 1       | HERC1                                  | 7/29                                         | 3/69                                                | .052                                                 |
| Stage 2 and 3 | AKAP9                                  | 8/74                                         | 2/94                                                | .42                                                  |
| Stage 4       | TP53                                   | 5/8                                          | 9/10                                                | .37                                                  |



**A**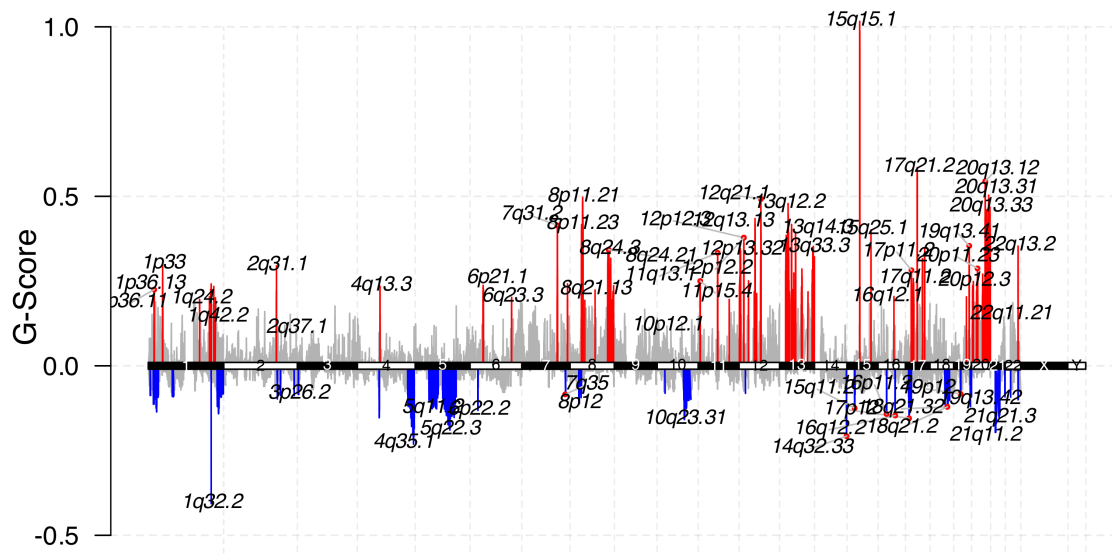**B**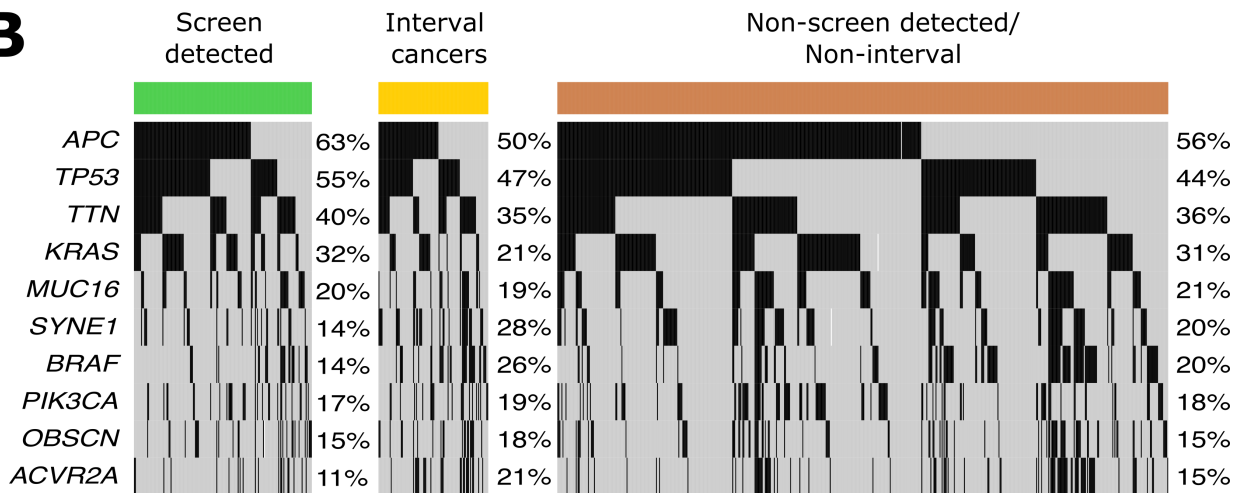



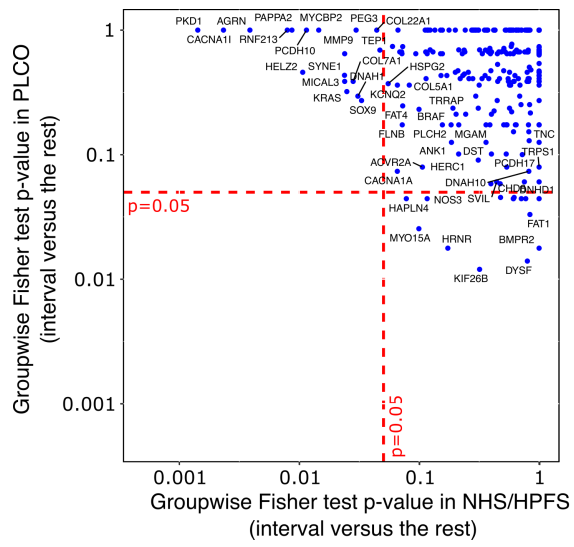

Supplement: NIHMS1830983-supplement-1.pdf [file NIHMS1830983-supplement-1.pdf]
